# Supplementary material for: Suicidal Ideation and Predictors of Psychological Distress during the COVID-19 Pandemic in Eswatini: A Population-Based Household Telephone Survey
Source: MDPI journal article supplement (doi:10.3390/ijerph18136700), 2021-06-22
Supplement: s1 [file s1]

**Table S1.** Weighted ordinal logistic regression models depicting predictors of psychological distress among adults during the COVID-19 pandemic in Eswatini ( $N = 993$ )

| Variable                                                          | Psychological distress Level                      |                                                   |                                                | COR (95% CI)         | AOR (95% CI)         |
|-------------------------------------------------------------------|---------------------------------------------------|---------------------------------------------------|------------------------------------------------|----------------------|----------------------|
|                                                                   | None/low ( $n = 499$ )<br>$n$ (wt <sup>a</sup> %) | Moderate ( $n = 415$ )<br>$n$ (wt <sup>a</sup> %) | Severe ( $n = 79$ )<br>$n$ (wt <sup>a</sup> %) |                      |                      |
| Age in years (ref: 25-59)                                         |                                                   |                                                   |                                                |                      |                      |
| 18-24                                                             | 111 (30.1)                                        | 108 (36.1)                                        | 14 (27.3)                                      | 1.16 (0.80, 1.68)    | 1.59 (0.09, 2.75)    |
| 60-92                                                             | 98 (20.1)                                         | 63 (18.0)                                         | 12 (14.0)                                      | 0.89 (0.57, 1.38)    | 0.84 (0.51, 1.37)    |
| Male (ref: Female)                                                | 158 (50.8)                                        | 109 (46.6)                                        | 8 (26.3)                                       | 0.72 (0.52, 1.00)    | 0.83 (0.58, 1.18)    |
| Marital status (ref: Single)                                      |                                                   |                                                   |                                                |                      |                      |
| Married/cohabiting                                                | 248 (46.4)                                        | 195 (45.2)                                        | 35 (44.6)                                      | 0.99 (0.71, 1.39)    | 1.84 (1.11, 3.05)*   |
| Widowed/divorced/separated                                        | 29 (3.5)                                          | 30 (6.2)                                          | 8 (5.3)                                        | 1.67 (0.83, 3.37)    | 1.50 (0.67, 3.39)    |
| Highest educational level attended (ref: Tertiary)                |                                                   |                                                   |                                                |                      |                      |
| Never schooled                                                    | 14 (3.4)                                          | 9 (2.4)                                           | 1 (3.1)                                        | 1.05 (0.36, 3.07)    | -                    |
| Primary/ <i>Sebenta</i>                                           | 33 (8.8)                                          | 27 (6.4)                                          | 5 (4.5)                                        | 0.97 (0.50, 1.86)    | -                    |
| Secondary                                                         | 53 (9.6)                                          | 65 (18.7)                                         | 12 (12.7)                                      | 2.35 (1.46, 3.80)*** | -                    |
| High school                                                       | 164 (36.3)                                        | 149 (40.6)                                        | 36 (58.5)                                      | 1.69 (1.16, 2.45)**  | -                    |
| Urban (ref: Rural)                                                | 277 (25.0)                                        | 260 (29.4)                                        | 56 (26.9)                                      | 1.21 (0.88, 1.65)    |                      |
| Subjective socioeconomic status (ref: Can't tell)                 |                                                   |                                                   |                                                |                      |                      |
| Very poor/poor                                                    | 36 (8.2)                                          | 46 (10.3)                                         | 10 (17.0)                                      | 1.57 (0.68, 3.65)    | -                    |
| Middle                                                            | 406 (80.0)                                        | 333 (81.4)                                        | 54 (69.0)                                      | 1.09 (0.56, 2.13)    | -                    |
| Very rich/rich                                                    | 17 (3.5)                                          | 9 (2.3)                                           | 4 (0.3)                                        | 0.63 (0.20, 2.03)    | -                    |
| Region (ref: Lubombo)                                             |                                                   |                                                   |                                                |                      |                      |
| Hhohho                                                            | 119 (23.8)                                        | 149 (36.6)                                        | 34 (36.8)                                      | 2.69 (1.65, 4.38)*** | 2.74 (1.60, 4.68)*** |
| Manzini                                                           | 161 (33.3)                                        | 148 (34.2)                                        | 25 (35.9)                                      | 1.85 (1.14, 3.03)*   | 2.00 (1.17, 3.42)*   |
| Shiselweni                                                        | 102 (19.2)                                        | 63 (16.2)                                         | 8 (13.2)                                       | 1.47 (0.85, 2.53)    | 1.47 (0.81, 2.67)    |
| Feel well informed about COVID-19 (ref: Yes)                      |                                                   |                                                   |                                                |                      |                      |
| No                                                                | 40 (8.6)                                          | 75 (20.6)                                         | 16 (24.5)                                      | 2.80 (1.79, 4.38)*** | 3.01(1.84, 4.92)***  |
| Not sure                                                          | 102 (20.5)                                        | 95 (20.1)                                         | 23 (25.2)                                      | 1.26 (0.84, 1.90)    | 1.14 (0.73, 1.78)    |
| Perceived ability to avoid contracting COVID-19 (ref: Moderate)   |                                                   |                                                   |                                                |                      |                      |
| Very easy/easy                                                    | 220 (45.6)                                        | 140 (33.8)                                        | 22 (33.9)                                      | 1.02 (0.63, 1.65)    | -                    |
| Very difficult/difficult                                          | 189 (36.4)                                        | 217 (52.0)                                        | 47 (58.1)                                      | 1.96 (1.24, 3.11)**  | -                    |
| Perceived probability of contracting COVID-19 (ref: Very low/low) |                                                   |                                                   |                                                |                      |                      |
| Moderate/                                                         | 94 (17.3)                                         | 83 (21.1)                                         | 17 (24.7)                                      | 1.64 (1.03, 2.60)*   | -                    |
| Very high/high                                                    | 224 (46.0)                                        | 193 (48.7)                                        | 45 (58.7)                                      | 1.43 (0.98, 2.08)    | -                    |

| Variable                                                                                          | Psychological distress Level                |                                             |                                          | COR (95% CI)          | AOR (95% CI)          |
|---------------------------------------------------------------------------------------------------|---------------------------------------------|---------------------------------------------|------------------------------------------|-----------------------|-----------------------|
|                                                                                                   | None/low (n = 499)<br>n (wt <sup>a</sup> %) | Moderate (n = 415)<br>n (wt <sup>a</sup> %) | Severe (n = 79)<br>n (wt <sup>a</sup> %) |                       |                       |
| Not sure                                                                                          | 9 (2.1)                                     | 9 (0.9)                                     | 2 (3.3)                                  | 0.82 (0.21, 3.30)     | -                     |
| Perceived severity if sick with COVID-19 (ref: Not severe/less severe)                            |                                             |                                             |                                          |                       |                       |
| Moderate                                                                                          | 127 (23.9)                                  | 99 (19.6)                                   | 10 (16.5)                                | 1.00 (0.64, 1.58)     | -                     |
| Very severe/severe                                                                                | 133 (27.6)                                  | 140 (39.0)                                  | 40 (46.8)                                | 1.81 (1.21, 2.71)**   | -                     |
| Not sure                                                                                          | 66 (13.7)                                   | 56 (12.5)                                   | 9 (14.4)                                 | 1.18 (0.68, 2.04)     | -                     |
| Self/family member lost job/business due to pandemic (Ref: No)                                    | 149 (32.9)                                  | 158 (37.5)                                  | 45 (57.9)                                | 1.45 (1.03, 2.03)*    | -                     |
| Knows people diagnosed with COVID-19 (ref: No)                                                    | 30 (4.0)                                    | 30 (5.0)                                    | 8 (9.6)                                  | 1.52 (0.72, 3.18)     | -                     |
| Burdened by the lockdown itself (ref: Not)                                                        | 86 (16.1)                                   | 111 (27.3)                                  | 15 (16.0)                                | 1.64 (1.14, 2.37)**   | 1.68 (1.12, 2.52)*    |
| Received COVID-19 food/financial relief from the government during lockdown (ref: No/not sure)    | 38 (8.7)                                    | 49 (13.7)                                   | 12 (20.4)                                | 1.82 (1.08, 3.07)*    | 2.06 (1.20, 3.55)**   |
| Sometimes/most of the time/always felt lonely during the lockdown (ref: Never/rarely felt lonely) | 41 (8.6)                                    | 134 (31.8)                                  | 58 (66.7)                                | 6.50 (4.07, 10.36)*** | 6.83 (4.32, 10.80)*** |

Notes. \* $p < .05$ ; \*\* $p < .01$ ; \*\*\* $p < .001$ ; Likelihood ratio test of proportionality of odds: ( $\chi^2$  (8) = 13.76,  $p = .09$ ). COR, crude odds ratio; AOR, adjusted odds ratio; CI, confidence interval; ref, reference category; wt, weighted; <sup>a</sup>Column totals.
